# Supplementary material
Source: Copernicus journal article supplement (doi:10.5194/tc-20-3073-2026)
Supplement: Supplementary file 1 [file tc-20-3073-2026-supplement.pdf]

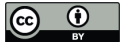

*Supplement of*

## **Langmuir turbulence in the Arctic Ocean: insights from a coupled sea ice–wave model**

**Aikaterini Tavri et al.**

*Correspondence to:* Aikaterini Tavri ([aikaterini\\_tavri@brown.edu](mailto:aikaterini_tavri@brown.edu))

The copyright of individual parts of the supplement might differ from the article licence.

## S1 Model variables and parameters

**Table S1.** Definitions and descriptions of parameters used from the neXtSIM and WAVEWATCH III models.

| <b>Parameter</b>                | <b>Description</b>                | <b>Units</b>       |
|---------------------------------|-----------------------------------|--------------------|
| <b>neXtSIM Model Parameters</b> |                                   |                    |
| $\tau_x$                        | Eastward stress at ocean surface  | Pa                 |
| $\tau_y$                        | Northward stress at ocean surface | Pa                 |
| $u_{ice}$                       | Sea ice x velocity                | $\text{ms}^{-1}$   |
| $v_{ice}$                       | Sea ice y velocity                | $\text{ms}^{-1}$   |
| $SIC$                           | Sea ice concentration             | –                  |
| $SIC_{young}$                   | Young ice concentration           | –                  |
| $SIT_{young}$                   | Young ice thickness               | m                  |
| $SIT$                           | Sea ice thickness                 | m                  |
| $SNT$                           | Surface snow thickness            | m                  |
| $D_{max}$                       | Maximum floe size                 | m                  |
| $D_{mean}$                      | Mean floe size                    | m                  |
| $SSS$                           | Sea surface salinity              | PSU                |
| $SST$                           | Sea surface temperature           | $^{\circ}\text{C}$ |
| $T_{2m}$                        | 2-m air temperature               | $^{\circ}\text{C}$ |
| <b>WW3 Model Parameters</b>     |                                   |                    |
| $dir$                           | Wave direction                    | degrees            |
| $d_p$                           | Peak wave direction               | degrees            |
| $f_p$                           | Peak wave frequency               | Hz                 |
| $H_s$                           | Significant wave height           | m                  |
| $ic1$                           | Ice thickness                     | m                  |
| $ic3$                           | Average ice floe diameter         | m                  |
| $ice$                           | Sea ice area fraction             | –                  |
| $t_{02}$                        | Mean wave period (second moment)  | s                  |
| $tus$                           | Northward Stokes transport        | –                  |
| $us$                            | Northward surface Stokes drift    | –                  |
| $wnd$                           | Wind speed                        | $\text{ms}^{-1}$   |

## S2 Evaluation of surface wind forcing

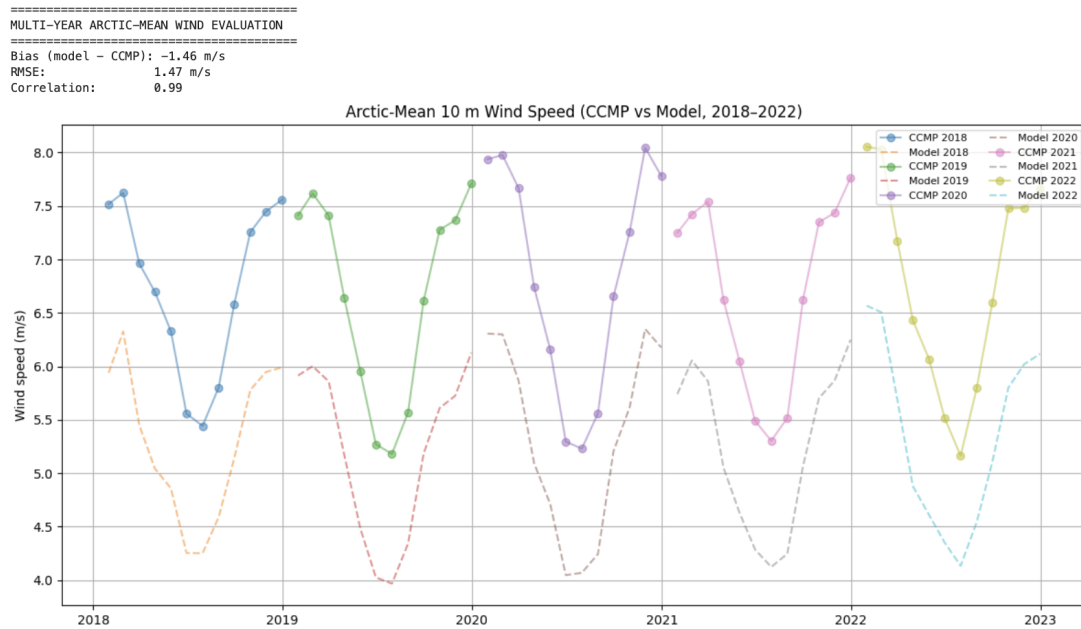

**Figure S1.** Arctic-mean monthly 10-m wind speed from CCMP (solid) and ERA5-forced model winds (dashed) for 2018–2022. The model captures the seasonal cycle and interannual variability ( $r = 0.99$ ) but exhibits a systematic low bias relative to CCMP.

### S3 Evaluation of significant wave height

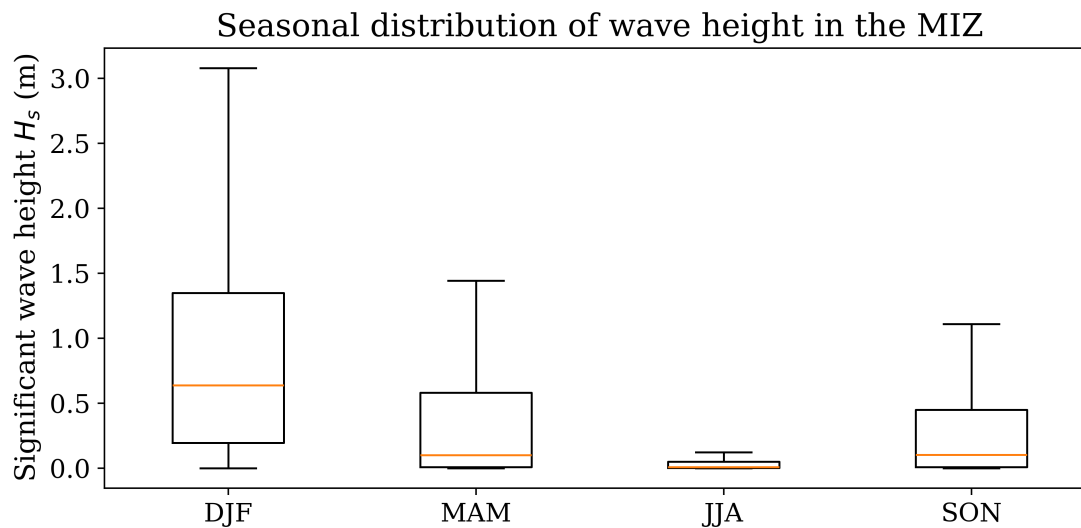

**Figure S2.** Seasonal distribution of significant wave height in the marginal ice zone (MIZ). Boxplots show the distribution of significant wave height  $H_s$  over MIZ grid cells ( $0.15 \leq \text{SIC} \leq 0.8$ ) for winter (DJF), spring (MAM), summer (JJA), and fall (SON).

### S4 Parametric plots for Langmuir Number and model parameters

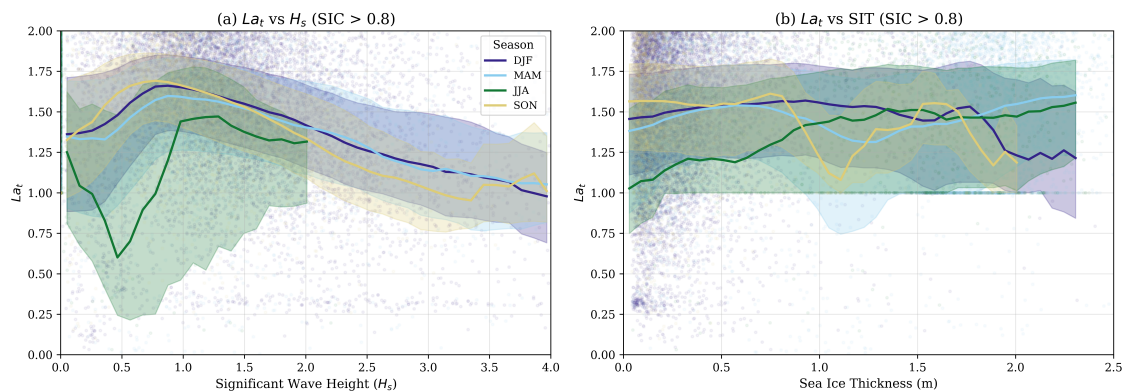

**Figure S3.** Seasonal dependence of  $La_t$  under compact ice conditions ( $\text{SIC} > 0.8$ ). (a)  $La_t$  as a function of significant wave height ( $h_s$ ), and (b)  $La_t$  as a function of sea ice thickness (SIT). Colored lines denote seasonal medians (DJF, MAM, JJA, SON), with shaded regions indicating variability (interquartile range). Background scatter points represent individual grid-cell values.
